# Supplementary material for: Novel cardiovascular biomarkers associated with peripheral arterial disease in men screened for abdominal aortic aneurysm
Source: Atypon-hosted journal article supplement (doi:10.1024/0301-1526/a000999), 2022-04-07
Supplement: 0301-1526_a000999_esm1.pdf [file 0301-1526_a000999_esm1.pdf]

## Electronic supplementary material

ESM 1. Differences in levels of biomarkers in with and without AAA according in participants with and without PAD

| Biomarker                                                            | With PAD              |                          |         | Without PAD           |                          |         |
|----------------------------------------------------------------------|-----------------------|--------------------------|---------|-----------------------|--------------------------|---------|
|                                                                      | With AAA<br>(Mean±SD) | Without AAA<br>(Mean±SD) | p-value | With AAA<br>(Mean±SD) | Without AAA<br>(Mean±SD) | p-value |
| <b>Secretoglobin family 3A member 2 (SCGB3A2)</b>                    | 2.7 (1.4)             | 1.9 (0.7)                | 0.034   | 2.0 (0.9)             | 1.8 (0.8)                | 0.096   |
| <b>Osteoprotegerin (OPG)</b>                                         | 3.2 (0.5)             | 3.1 (0.2)                | 0.308   | 3.0 (0.3)             | 2.9 (0.3)                | 0.021   |
| <b>Urokinase-type plasminogen activator surface receptor (U-PAR)</b> | 3.8 (0.5)             | 3.5 (0.4)                | 0.051   | 3.6 (0.4)             | 3.3 (0.3)                | 0.000   |
| <b>Serum macrophage chemokine ligand 16 (CXCL16)</b>                 | 4.9 (0.4)             | 4.9 (0.3)                | 0.686   | 4.8 (0.3)             | 4.6 (0.2)                | 0.002   |
| <b>Matrix metalloproteinase 9 (MMP-9)</b>                            | 3.5 (0.9)             | 3.3 (0.4)                | 0.313   | 3.1 (0.8)             | 2.8 (0.7)                | 0.018   |
| <b>P-selectin (SELP)</b>                                             | 8.9 (0.7)             | 8.8 (0.3)                | 0.805   | 8.6 (0.5)             | 8.4 (0.5)                | 0.002   |
| <b>Growth differentiation factor 15 (GDF-15)</b>                     | 4.4 (0.6)             | 4.0 (0.8)                | 0.366   | 4.1 (0.6)             | 3.7 (0.4)                | <0.0001 |
| <b>Elafin (PI3)</b>                                                  | 3.6 (0.5)             | 3.4 (0.4)                | 0.649   | 3.3 (0.6)             | 3.0 (0.5)                | 0.001   |
| <b>Cystatin B (CSTB)</b>                                             | 4.8 (0.5)             | 4.7 (0.4)                | 0.542   | 4.6 (0.5)             | 4.3 (0.4)                | <0.0001 |
| <b>Trefoil factor 3 (TFF3)</b>                                       | 4.9 (0.4)             | 4.7 (0.4)                | 0.211   | 4.7 (0.5)             | 4.5 (0.3)                | <0.0001 |
| <b>Fatty acid-binding protein 4 (FABP4)</b>                          | 3.9 (0.9)             | 4.1 (1.0)                | 0.599   | 3.6 (0.8)             | 3.3 (0.6)                | <0.0001 |
