# Supplementary material for: Novel cardiovascular biomarkers associated with peripheral arterial disease in men screened for abdominal aortic aneurysm
Source: Atypon-hosted journal article supplement (doi:10.1024/0301-1526/a000999), 2022-04-07
Supplement: 0301-1526_a000999_esm2.pdf [file 0301-1526_a000999_esm2.pdf]

## Electronic supplementary material

### ESM 2. List of abbreviations

|               |                                      |                |                                                       |
|---------------|--------------------------------------|----------------|-------------------------------------------------------|
| <b>AAA</b>    | abdominal aortic aneurysm            | <b>MMP-9</b>   | matrix metalloproteinase 9                            |
| <b>ABI</b>    | ankle brachial index                 | <b>NPX</b>     | Normalised Protein Expression                         |
| <b>AUC</b>    | area under the curve                 | <b>OPG</b>     | osteoprotegerin                                       |
| <b>BMI</b>    | body-mass index                      | <b>OR</b>      | Odds Ratio                                            |
| <b>BP</b>     | blood pressure                       | <b>p</b>       | plasma                                                |
| <b>CLTI</b>   | chronic limb threatening ischemia    | <b>PAD</b>     | Peripheral arterial disease                           |
| <b>CSTB</b>   | cystatin B                           | <b>PEA</b>     | Proximity Extension Assay                             |
| <b>CV</b>     | cardiovascular                       | <b>PI3</b>     | elafin                                                |
| <b>CVD</b>    | cardiovascular disease               | <b>ROC</b>     | Receiver-operating characteristic                     |
| <b>CXCL16</b> | serum macrophage chemokine ligand 16 | <b>S</b>       | systolic                                              |
| <b>D</b>      | diastolic                            | <b>SCGB3A2</b> | secretoglobin family 3A member 2                      |
| <b>DM</b>     | diabetes mellitus                    | <b>SELP</b>    | p-selectin                                            |
| <b>EDTA</b>   | ethylenediaminetetraacetic acid      | <b>TFF3</b>    | trefoil factor 3                                      |
| <b>FABP4</b>  | fatty acid-binding protein 4         | <b>TG</b>      | triglycerides                                         |
| <b>GDF-15</b> | growth differentiation factor 15     | <b>U-PAR</b>   | urokinase-type plasminogen activator surface receptor |
| <b>Hb</b>     | haemoglobin                          | <b>US</b>      | ultrasound                                            |
| <b>HDL</b>    | high-density lipoprotein             |                |                                                       |
| <b>IC</b>     | intermittent claudication            |                |                                                       |
| <b>IQR</b>    | interquartile range                  |                |                                                       |
| <b>LDL</b>    | low-density lipoprotein              |                |                                                       |
